# Supplementary material for: Improved highly efficient Dion–Jacobson type perovskite light-emitting diodes by effective surface polarization architecture
Source: Royal Society of Chemistry journal article supplement (doi:10.1039/d1cp04951h), 2022-01-01
Supplement: d1cp04951h1.pdf [file d1cp04951h1.pdf]

**Improved highly efficient Dion-Jacobson type perovskite light-emitting diodes by effective surface polarization architecture**

**Supporting Information**

Hanjun Yang <sup>a, b</sup>, Jun Tang<sup>a</sup>, Liangliang Deng <sup>a</sup>, Zhe Liu <sup>a</sup>, Xia Yang <sup>c</sup>, Zengqi Huang <sup>d</sup>,  
Haomiao Yu <sup>a</sup>, Kai Wang <sup>a</sup> and Jinpeng Li <sup>a \*</sup>

<sup>a</sup>Key Laboratory of Luminescence and Optical Information, Ministry of Education, School of Science, Beijing Jiaotong University, Beijing 100044, China

<sup>b</sup>Jiangxi Key Laboratory of Flexible Electronics, Flexible Electronics Innovation Institute, Jiangxi Science & Technology Normal University, Nanchang 330013, Jiangxi, China

<sup>c</sup>Department of Materials Science and Engineering, University of Science and Technology Beijing, Beijing 100083, China.

<sup>d</sup>Key Laboratory of Green Printing, Institute of Chemistry, Chinese Academy of Sciences (ICCAS), 2 Zhongguancun Beiyi Street, Beijing 100190, China

**Table S1.** Summarized performance of DJ type perovskite light-emitting diodes reported in previous and present works.

| The device structure                                                                                          | Type of pervosite     | Color  | EL spectrum and parameters                                         | Ref.        |
|---------------------------------------------------------------------------------------------------------------|-----------------------|--------|--------------------------------------------------------------------|-------------|
| ITO/PEDOT:PSS/<br>PEA <sub>2</sub> MA <sub>2</sub> Pb <sub>3</sub> I <sub>10</sub> (with<br>MACl)/PCBM/PEI/Ag | Quasi-2D              | 8.64%  | EL:645 nm<br>$EQE_{max}=2.2\%$<br>$L_{max}=1598$ cd/m <sup>2</sup> | Our<br>work |
| ITO/PEDOT:PSS/MAPbBr <sub>2</sub> /P<br>C <sub>61</sub> BM/Ca/Al                                              | 3D                    | 14.02% | EL:690 nm<br>$L_{max}=1710$ cd/m <sup>2</sup>                      | [1]         |
| ITO/SnO <sub>2</sub> /MAPbI <sub>3</sub> /Spiro-<br>OMeTAD (FN-Br)/Au                                         | 3D                    | 21.54% | EL:772 nm<br>$EQE_{max}=4.3\%$                                     | [2]         |
| FTO/TiO <sub>2</sub> /2D 3D<br>heterostructure /Spiro-<br>OMeTAD/Au                                           | 2D 3D heterostructure | 21.02% | EL:771 nm<br>$EQE_{max}=5.13\%$                                    | [3]         |
| ITO/PEDOT:PSS/MAPbBr <sub>2</sub> /P<br>CBM/<br>LiF/Al                                                        | 3D                    | 5-8%   | EL:690-750 nm<br>$EQE_{max}=0.03\%$                                | [4]         |
| FTO/NiO/MAPbI <sub>3</sub> -QDs<br>/PCBM/Ag                                                                   | Quantum dot           | 17.1%  | EL:778 nm<br>$EQE_{max}=0.084\%$                                   | [5]         |
| ITO/PEDOT:PSS/MAPbBr <sub>3</sub> /Zn<br>O/<br>PEIBIm <sub>4</sub> /Ag                                        | 3D                    | 2.41%  | EL:778 nm<br>$EQE_{max}=0.0011\%$<br>$L_{max}=9$ cd/m <sup>2</sup> | [6]         |

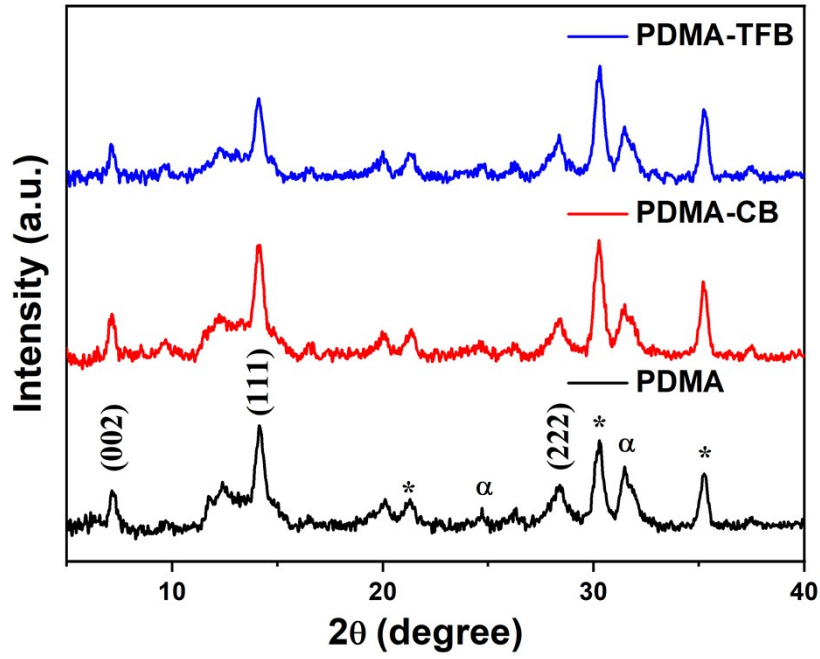

**Figure S1.** XRD patterns of perovskite films by different treatment upon ITO/ZnO/PEIE. \* and  $\alpha$  markers represent ITO and FAPbI<sub>3</sub>.

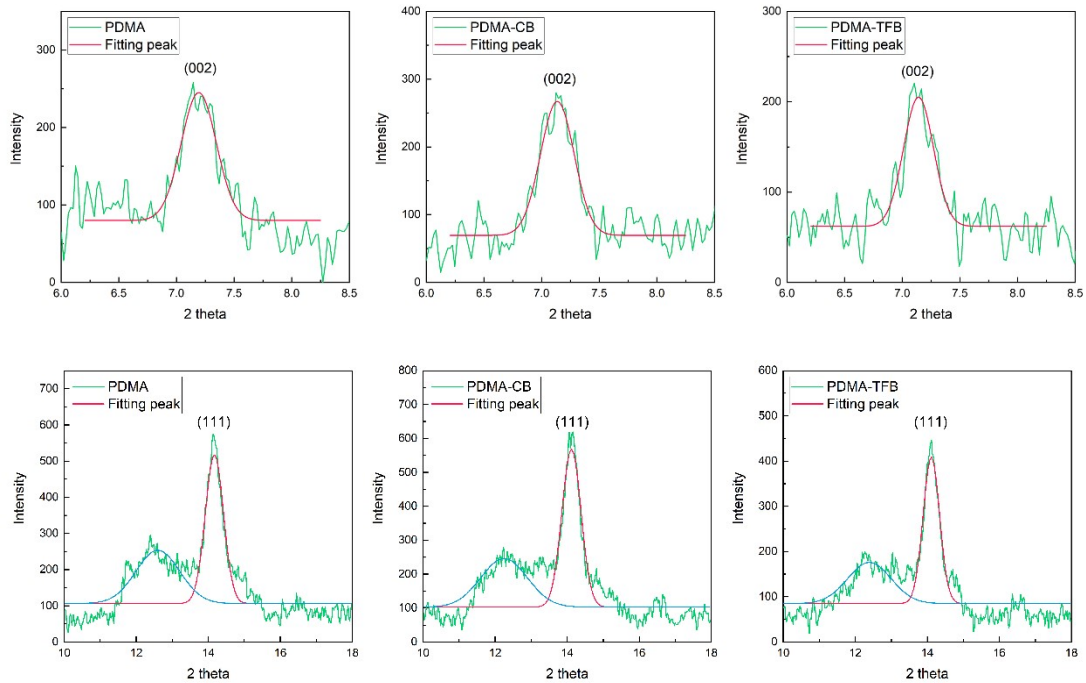

**Figure S2.** XRD pattern of (002) and (111) planes and their fitting results of all samples.



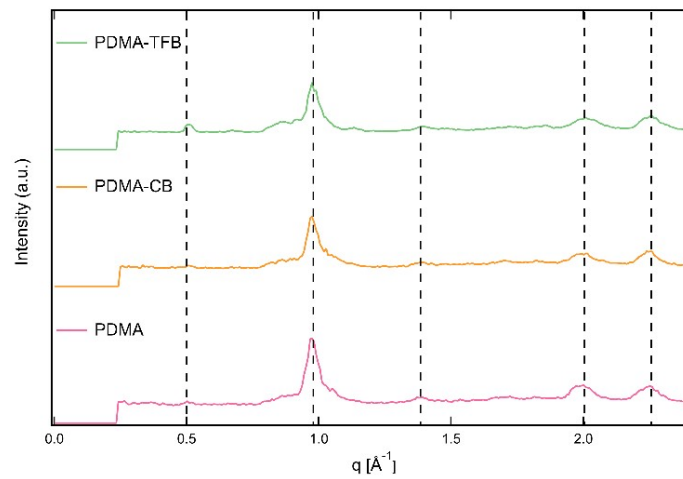

**Figure S3.** Radical integrated intensity of reciprocal space maps for three samples.

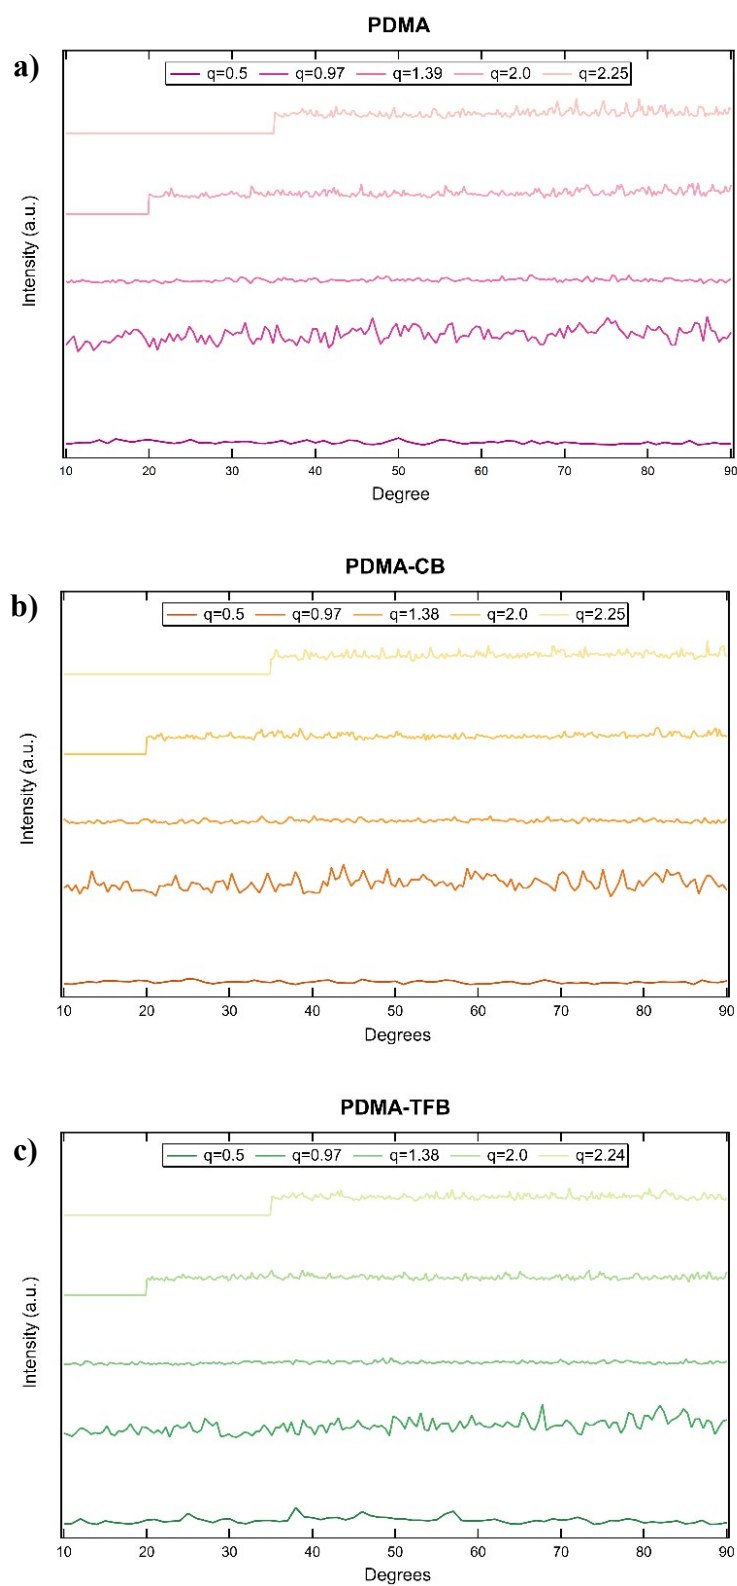

**Figure S4.** The azimuthal distribution intensity extracted from  $q$ -maps for three samples a) PDMA, b) PDMA-CB, c) PDMA-TFB.

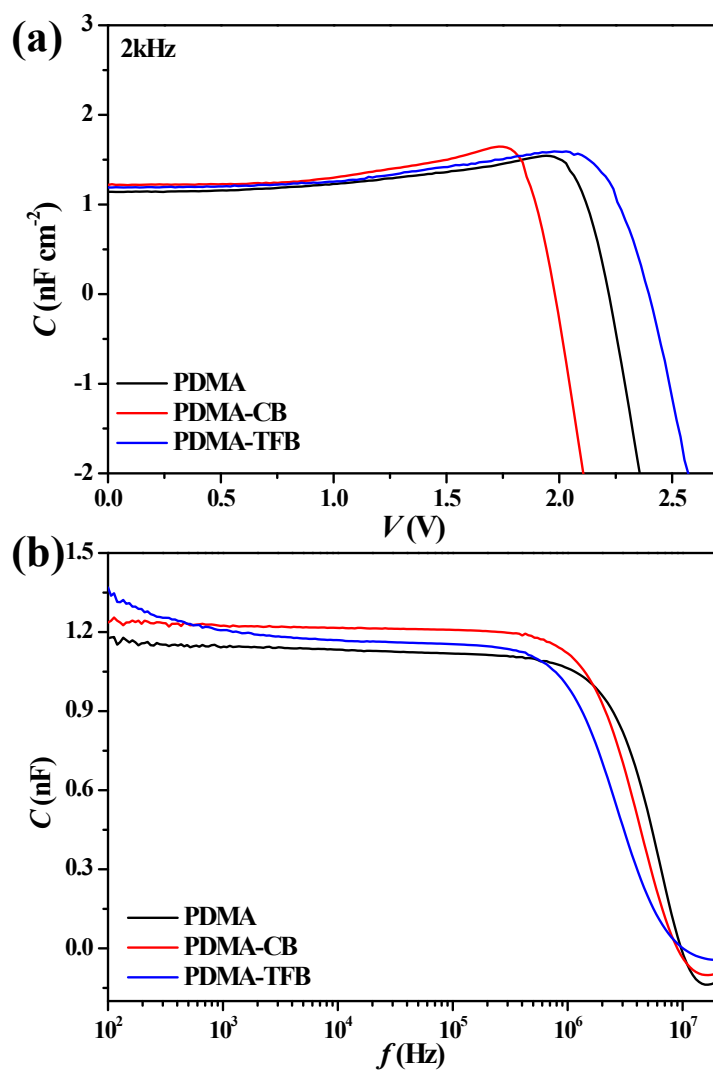

**Figure S5.** (a) Capacitance as a function of voltage ( $C$ - $V$ ) (b) Room temperature  $C$ - $f$  spectra for DJ-PLEDs with different treatment for frequencies of 2kHz in dark condition.

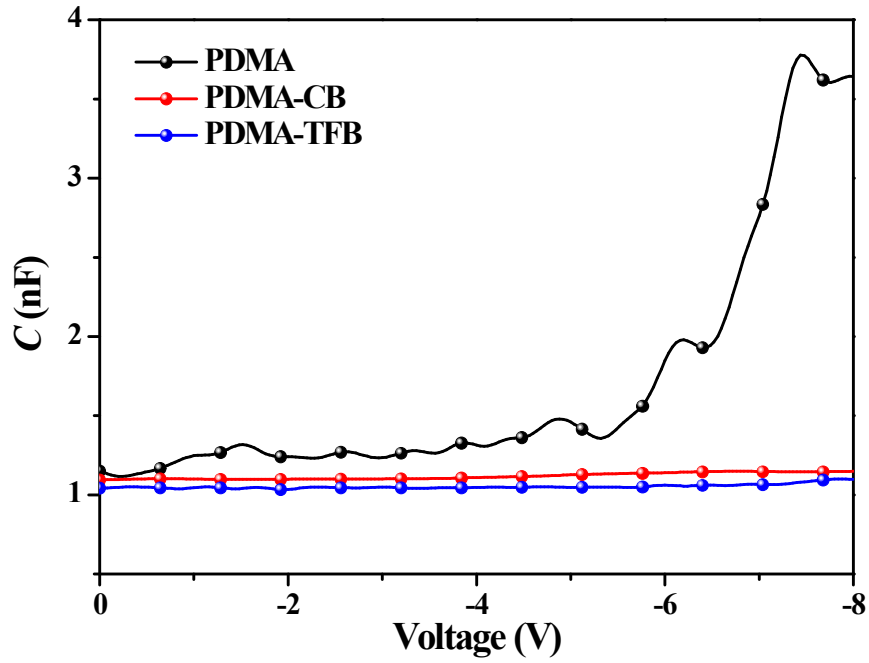

**Figure S6.** The  $C$ - $V$  measurements of the PDMA, PDMA-CB, and PDMA-TFB perovskite devices (ITO/ZnO/PEIE/perovskite/TFB/MoO<sub>3</sub>/Au). The values of  $C$  can be determined to the saturated part towards the negative voltage in the  $C$ - $V$  curves. The equation of  $\epsilon = (CL)/(\epsilon_0 S)$  can be used to calculate the  $\epsilon$ , where  $\epsilon_0$ ,  $L$  and  $S$  represent vacuum permittivity, the thickness of the perovskite film and device area, respectively.



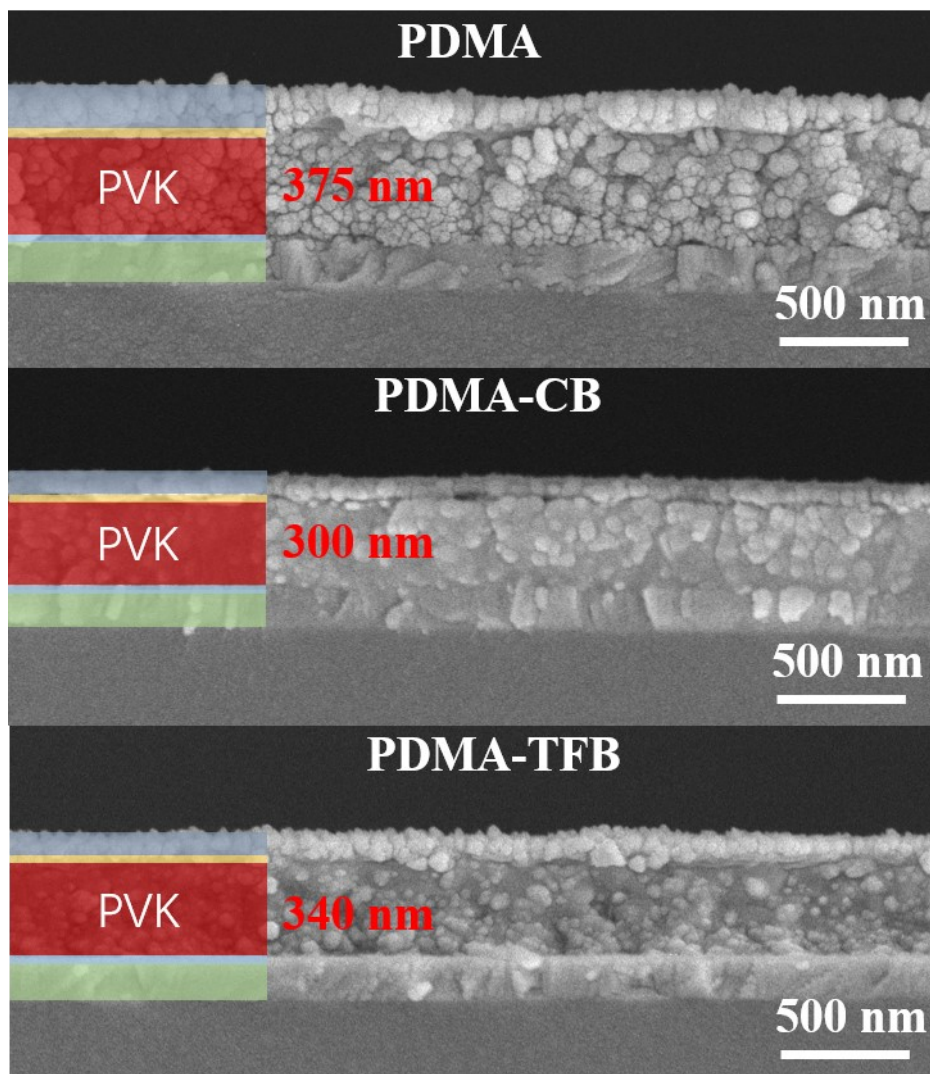

**Figure S7.** The cross-section scanning electron microscopy (SEM) of PDMA, PDMA-CB, and PDMA-TFB perovskites based on the device structure of indium tin oxide (ITO) (green)/ZnO-polyethylenimine ethoxylated (PEIE) (blue)/perovskite (red)/poly-[(9,9-dioctylfluorenyl-2,7-diyl)-alt-(4,4'-(*N*-(4-butylphenyl) (TFB) (yellow)/MoO<sub>3</sub>-Ag (purple).

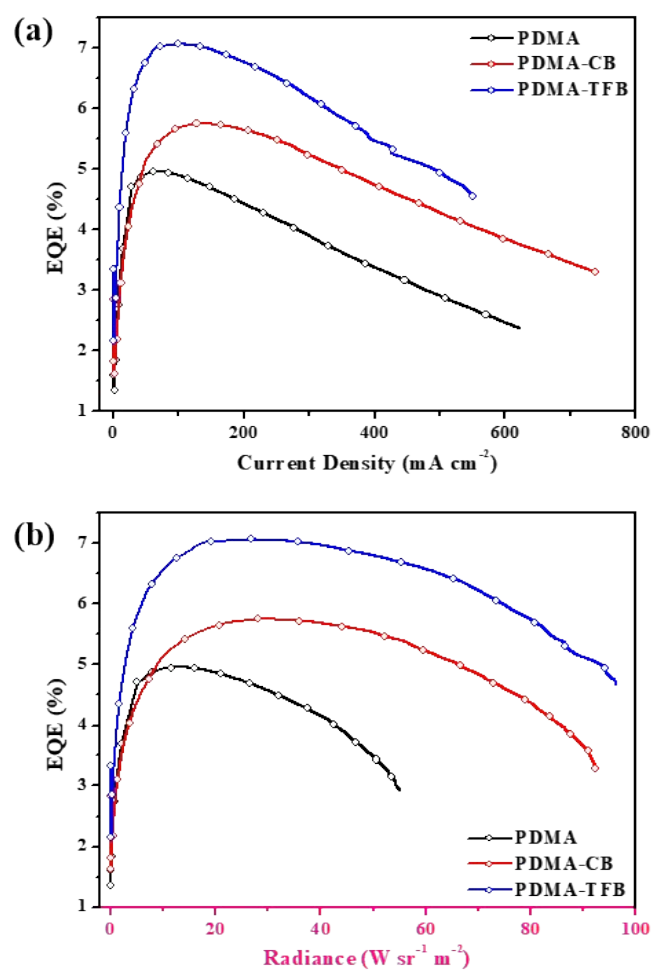

**Figure S8.** (a) EQE-current density curve and (b) Radiance-dependent EQE of various treatment PeLEDs.

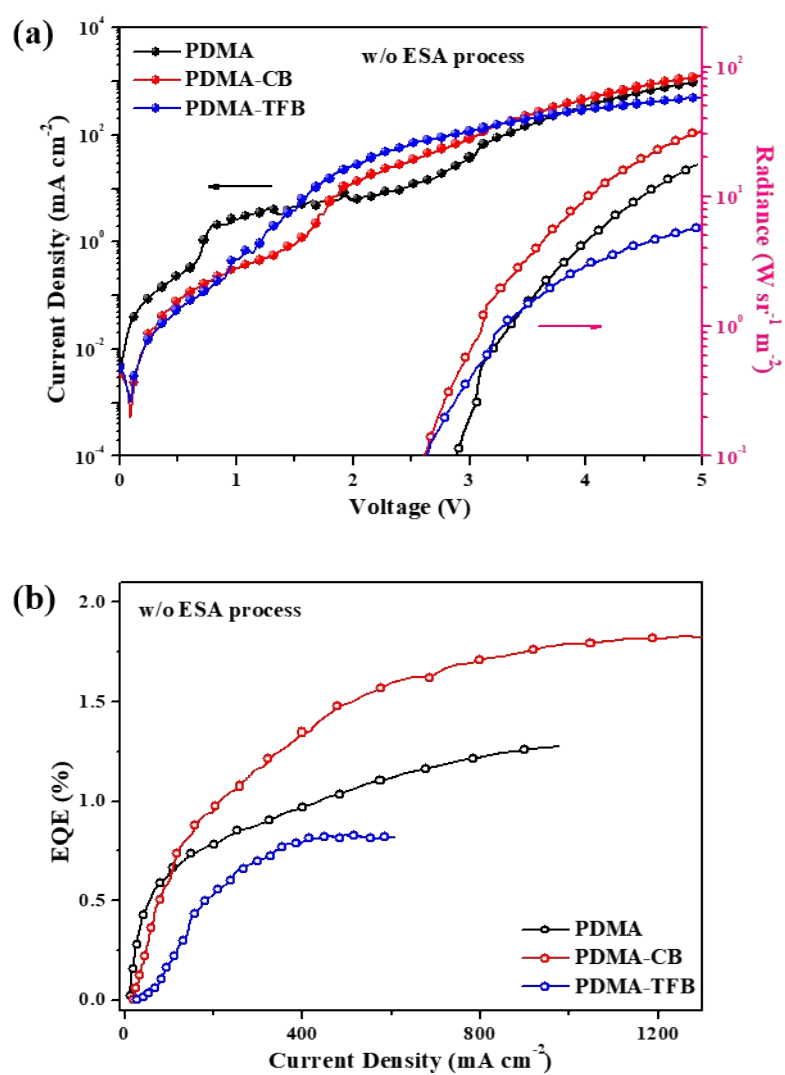

**Figure S9.** Characteristics of q-2D type PeLEDs without ESA process. (a) Current density-voltage-radiance curves. (b) EQE-current density curve.

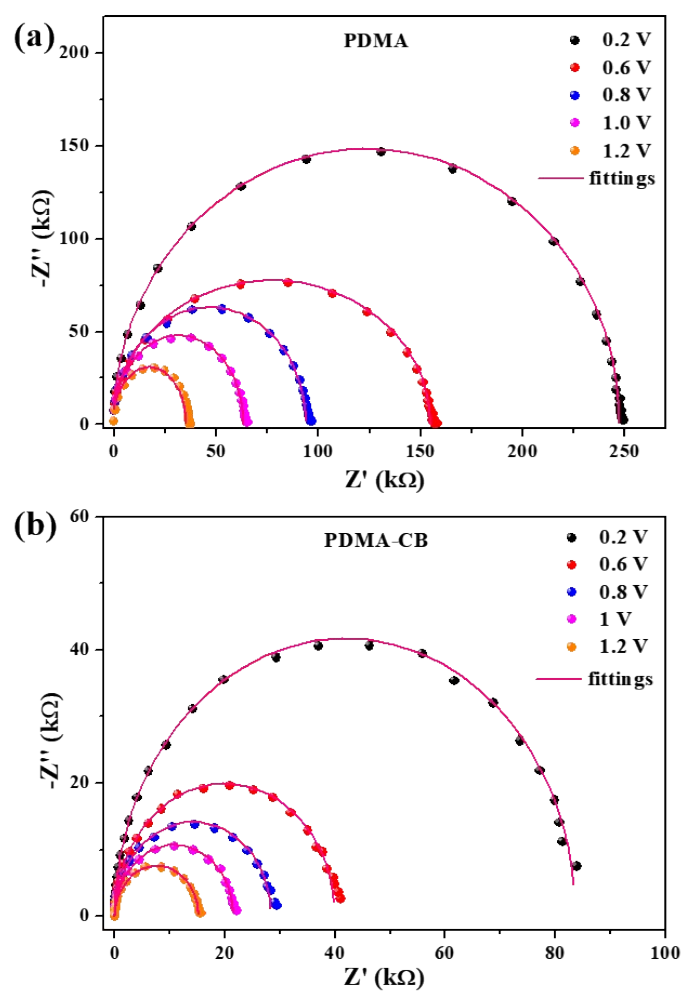

**Figure S10.** Nyquist impedance spectra for the PDMA (a) and PDMA-CB (b) PeLED devices.

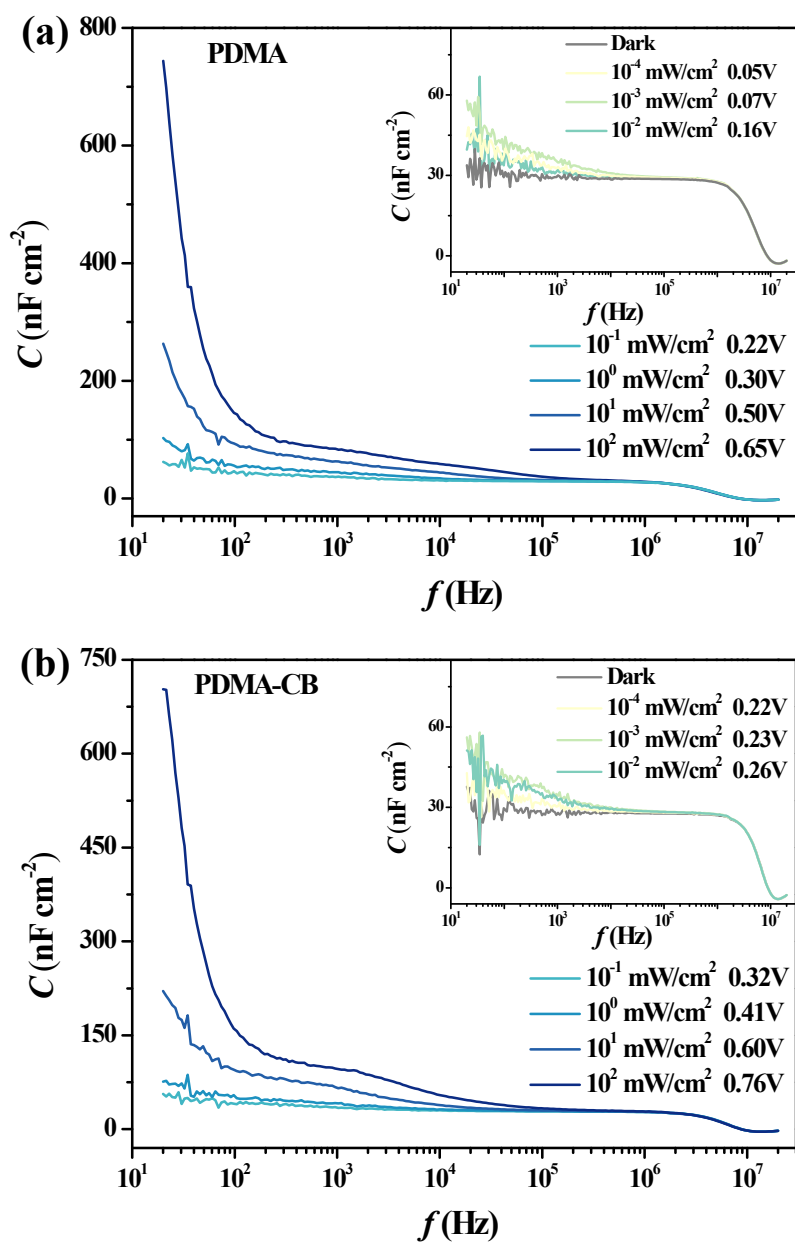

**Figure S11.** Room temperature  $C$ - $f$  spectra for (a) the PDMA and (b) PDMA-CB PeLEDs measured at different light intensity with the bias voltage corresponding to the light-induced built-in voltage.

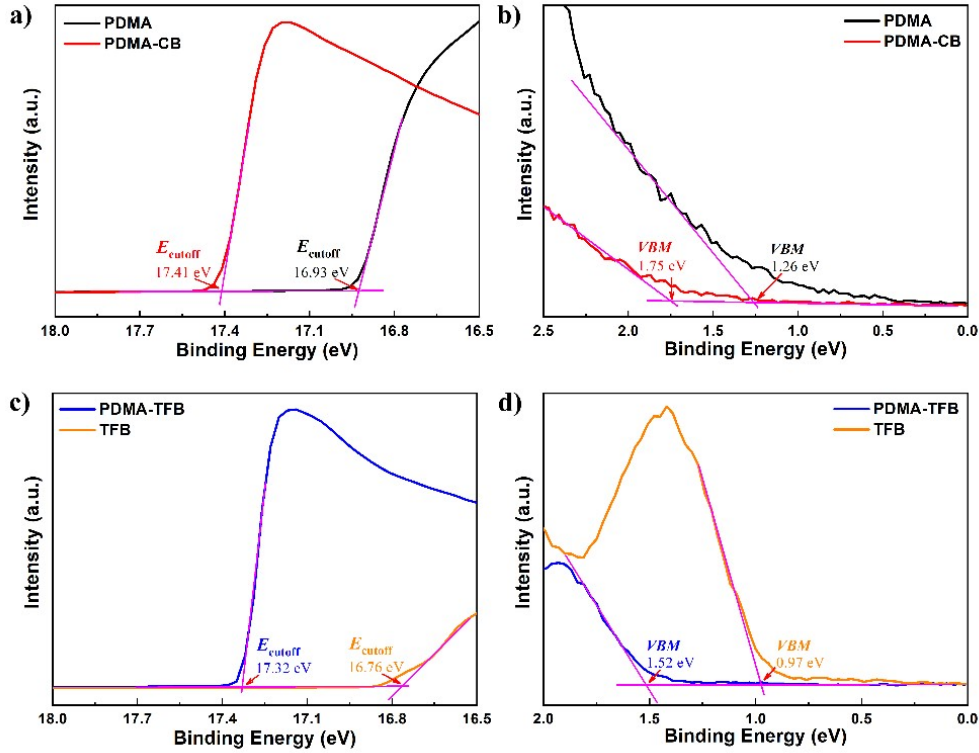

**Figure S12.** UPS spectra of different films on ITO/ZnO/PEIE substrates. (a)(c) photoemission cutoff ( $E_{\text{cutoff}}$ ) and (b)(d) valance-band region ( $E_F$ ).

The related values to extract UPS data have been shown in the Figure S8. The value of  $E_{\text{cutoff}}$  are 16.93 eV (PDMA), 17.41 eV (PDMA-CB), 17.32 eV (PDMA-TFB) and 16.76 eV (TFB), respectively. The value of  $E_F$  are 1.26 eV (PDMA), 1.75 eV (PDMA-CB), 1.52 eV (PDMA-TFB) and 0.97 eV (TFB). The valance-band of PDMA, PDMA-CB, PDMA-TFB, and TFB films are calculated to be **-5.53 eV**, **-5.52 eV**, **-5.41 eV** and **-5.40 eV**, respectively.

**Table S2.** Summary of FWHM of quasi-2D perovskite XRD profiles with various treatments.

|                 | (002) (2 $\theta$ ) | (111) (2 $\theta$ ) |
|-----------------|---------------------|---------------------|
| <b>PDMA</b>     | 0.35                | 0.60                |
| <b>PDMA-CB</b>  | 0.34                | 0.63                |
| <b>PDMA-TFB</b> | 0.31                | 0.54                |

**Table S3.** The summary of quasi-2D PeLED performance without the ESA process.

|                 | V <sub>T</sub> (V) | EQE (%) | J (mA cm <sup>-2</sup> ) | R (W sr <sup>-1</sup> m <sup>-2</sup> ) |
|-----------------|--------------------|---------|--------------------------|-----------------------------------------|
| <b>PDMA</b>     | 2.9                | 1.3     | 975                      | 18                                      |
| <b>PDMA-CB</b>  | 2.6                | 1.8     | 1076                     | 34                                      |
| <b>PDMA-TFB</b> | 2.6                | 0.8     | 495                      | 7                                       |

**Table S4.** Fitting parameters were obtained from time-resolved photoluminescence decay transients and the quantum yields (PLQY) of quasi-2D perovskite films with various treatments.

|                 | $\tau_1$ (ns) | A <sub>1</sub> | $\tau_2$ (ns) | A <sub>2</sub> | $\tau_{avg}$ (ns) | PLQY(%) |
|-----------------|---------------|----------------|---------------|----------------|-------------------|---------|
| <b>PDMA</b>     | 12            | 0.69           | 144           | 0.31           | 53                | 69      |
| <b>PDMA-CB</b>  | 14            | 0.63           | 155           | 0.37           | 66                | 93      |
| <b>PDMA-TFB</b> | 16            | 0.70           | 150           | 0.30           | 56                | 81      |

**Table S5.** The parameters are obtained by fitting from the impedance spectra.

| <b>PDMA</b> | <b>R<sub>s</sub> (Ω)</b> | <b>R<sub>ct</sub> (kΩ)</b> | <b>C (nF)</b> |
|-------------|--------------------------|----------------------------|---------------|
| 0.2 V       | 71                       | 297                        | 1.129         |
| 0.6 V       | 70                       | 156                        | 1.145         |
| 0.8 V       | 69                       | 127                        | 1.161         |
| 1.0 V       | 65                       | 96                         | 1.215         |
| 1.2 V       | 61                       | 62                         | 1.346         |

  

| <b>PDMA-CB</b> | <b>R<sub>s</sub> (Ω)</b> | <b>R<sub>ct</sub> (kΩ)</b> | <b>C (nF)</b> |
|----------------|--------------------------|----------------------------|---------------|
| 0.2 V          | 40                       | 83                         | 1.089         |
| 0.6 V          | 40                       | 39                         | 1.095         |
| 0.8 V          | 40                       | 28                         | 1.101         |
| 1.0 V          | 40                       | 21                         | 1.105         |
| 1.2 V          | 39                       | 15                         | 1.096         |

  

| <b>PDMA-TFB</b> | <b>R<sub>s</sub> (Ω)</b> | <b>R<sub>ct</sub> (kΩ)</b> | <b>C (nF)</b> |
|-----------------|--------------------------|----------------------------|---------------|
| 0.2 V           | 45                       | 174                        | 1.107         |
| 0.6 V           | 45                       | 61                         | 1.105         |
| 0.8 V           | 45                       | 50                         | 1.109         |
| 1.0 V           | 45                       | 29                         | 1.109         |
| 1.2 V           | 45                       | 3                          | 1.100         |
